# Supplementary material for: Engineering dynamic cell cycle control with synthetic small molecule-responsive RNA devices
Source: PubMed Central journal article supplement (PMC4654890; doi:10.1186/s13036-015-0019-7), 2015-11-20
Supplement: 13036_2015_19_MOESM1_ESM.pdf [file 13036_2015_19_MOESM1_ESM.pdf]

# **Engineering dynamic cell cycle control with synthetic small-molecule responsive RNA devices**

Wei KY and Smolke CD

## **SUPPLEMENTARY INFORMATION**

**Text S1.** Plasmid construction

**Figure S1.** Overview of DNA staining and cell cycle quantification experiments

**Figure S2.** Representative histograms of cell count vs. DNA staining

**Figure S3.** Double thymidine block

**Figure S4.** siRNA knockdown of CDK4, CDK6, or both CDK4 and CDK6 in U2-OS cells

**Figure S5.** Ribozyme switch controls for arresting cells in G2/M

**Figure S6.** Ribozyme switch controls for arresting cells in G0/1

**Figure S7.** Plasmid maps

**Table S1.** Regulatory nodes tested in this study

**Table S2.** Ribozyme switch performance in yeast and HEK293

**Table S3.** Cell lines created in this study

**Table S4:** Primer sequences

**Table S5.** List of the plasmids used in this study

**Table S6:** Sequences of ribozyme controls and switches used in this study

**References**

## **Text S1. Plasmid construction**

All primers used in this study are listed in Table S4. All plasmids used in this study are listed in Table S5. All cell lines created and used in this study are listed in Table S2. Brief details on the construction of various plasmids built for this study are provided below and plasmid maps are drawn in Fig S7.

The plasmid construct used as the transfection marker to screen potential cell cycle regulatory nodes (pCS2622; Fig S7) is built on a pcDNA3.1(+) backbone (Life Technologies) and encodes an expression cassette for a transfection marker and the regulatory node. First, a fragment encoding a bGH polyA tail and the CMV promoter was PCR amplified from pCS1036 [1] using primers BsrGI\_EcoRI\_bGHpA\_fwd and ApaI\_XbaI\_XhoI\_CMV\_rev. This fragment was inserted into pCS408 (pcDNA3.1(+) with EGFP cloned into the KpnI and XhoI restriction sites [1]) via the BsrGI and ApaI restriction sites to create CMV-EGFP-bGHpA-CMV-bGHpA. Next, a fragment encoding an EGFP reporter with a Us9 localization tag (Us9-EGFP), which localized the reporter to the golgi and plasma membranes [2], was PCR amplified from pCS2052 (Addgene #18657) using primers Us9\_KpnI\_fwd and EGFP\_EcoRI\_rev. This fragment was inserted into the intermediate plasmid described above via the KpnI and EcoRI restriction sites. Finally, a fragment encoding the HSVTK polyA tail was PCR amplified from pCS2587 using primers HSVTK\_EcoRI\_fwd and HSVTK\_EcoRV\_rev. This fragment was inserted into the intermediate plasmid described above via the EcoRI and EcoRV restriction sites to create pCS2622.

Plasmid pCS2622-p16 (pCS3341), used as the tandem cassette for p16 in tuning expression of key regulators, was constructed by PCR amplifying p16 using primers p16\_Sall\_XbaI\_fw and p16\_ApaI\_rv and inserting into pCS2622 via XhoI and XbaI. Plasmid

pCMV p16 INK4A from which p16 was amplified was a gift from Bob Weinberg (Addgene plasmid # 10916).

Plasmid pCS2622-p27 (pCS3342), used as the tandem cassette for p27 in tuning expression of key regulators, was constructed by PCR amplifying p27 from using primers GB\_2622\_p27\_fw and GB\_2622\_p27\_rv and inserting into pCS2622 via KpnI and BamHI using Gibson assembly. Plasmid pCMV5 human p27 from which p27 was amplified was a gift from Joan Masague (Addgene plasmid #14049).

Plasmid pCS2441, the plasmid backbone for site-specific integration of constructs into cell lines, was built on the pcDNA5/FRT (Invitrogen) backbone such that the existing expression vector CMV-GOI-bGHpA is replaced by CMVTetO2-DsRed-bGHpA (Fig S7). Specifically, the CMV-d2EGFP-bGHpA cassette in pCS2407 [3] was replaced by a multiple cloning site containing MfeI-NruI-NheI-AflII-HindII-AvrII-XmaI by annealing primers MCS\_fwd and MCS\_rev and ligating into the vector via MfeI/XmaI.

pCS2441-Wee1mut (pCS3246), used in screening potential regulatory nodes, was constructed by PCR amplifying Wee1mut using primers GB\_2441\_Wee1mut\_fw and GB\_2441\_Wee1mut\_rv and inserting into pCS2441 via BamHI and KpnI, replacing DsRed. Wee1mut sequence was ordered from Gen9 (Cambridge, MA).

pCS2441-syn21p27 (pCS3249), the base plasmid for G0/1 cell cycle controllers, was constructed by PCR amplifying p27 from pCMV5 human p27 (a gift from Joan Massague (Addgene plasmid # 14049)) using primers GB\_2441\_syn21\_fw and GB\_2441\_p27\_rv and inserting into pCS2441 BamHI and ApaI, replacing DsRed. The OFF control (sTRSV) and switch th-A (theoRs2) were PCR amplified using primers RzXhoIASiSI\_fw and RzApaIPacI\_rv and inserted into the restriction sites XhoI and ApaI to form pCS2441-syn21p27-sTRSV

(pCS3250) and pCS2441-syn21p27-theoRs2 (pCS3252), which are used to test small molecule control of cell cycle arrest in G0/1.

pCS2441-syn21CCNB1mut (pCS3256), the base plasmid for G2/M cell cycle controllers, was constructed by PCR amplifying CyclinB1(L45A,R42A) from pCyclinB1(L45A,R42A)-mCherry (a gift from Jonathon Pines (Addgene plasmid # 39852) using primers BamHI\_XbaI\_CCNB1\_fw and ApaI\_XhoI\_CCNB1\_rv and inserting into the relevant pCS2441-switch vector via BamHI and ApaI, replacing DsRed. The OFF control (sTRSV) and switches were PCR amplified using primers RzXhoIAsiSI\_fw and RzApaIPacI\_rv and inserted into the restriction sites XhoI and ApaI to form pCS2441-syn21CCNB1mut-sTRSV (pCS3257), pCS2441-syn21CCNB1mut-theoRs2 (pCS3261; CCNB1mut Switch th-A), pCS2441-syn21CCNB1mut-theoRs4 (pCS3262; CCNB1mut Switch th-B), pCS2441-syn21CCNB1mut-L2b9(1x) (pCS3259; CCNB1mut Switch th-C), and pCS2441-syn21CCNB1mut-L2b9(2x) (pCS3260; CCNB1mut Switch th-Cx2), which are used to test small molecule control of cell cycle arrest in G2/M.

pCS2786-Cas9-mCherry-theoRs2 (pCS3256), used to characterize switch th-A (theoRs2) activity, was constructed by PCR amplifying a DNA fragment encoding a P2A cleavable linker, mCherry, and switch th-A with primers GB\_Cas9\_P2A\_fw and GB\_postRZ\_rv from an existing plasmid and inserting into pCS2786-Cas9 via XbaI using Gibson assembly.

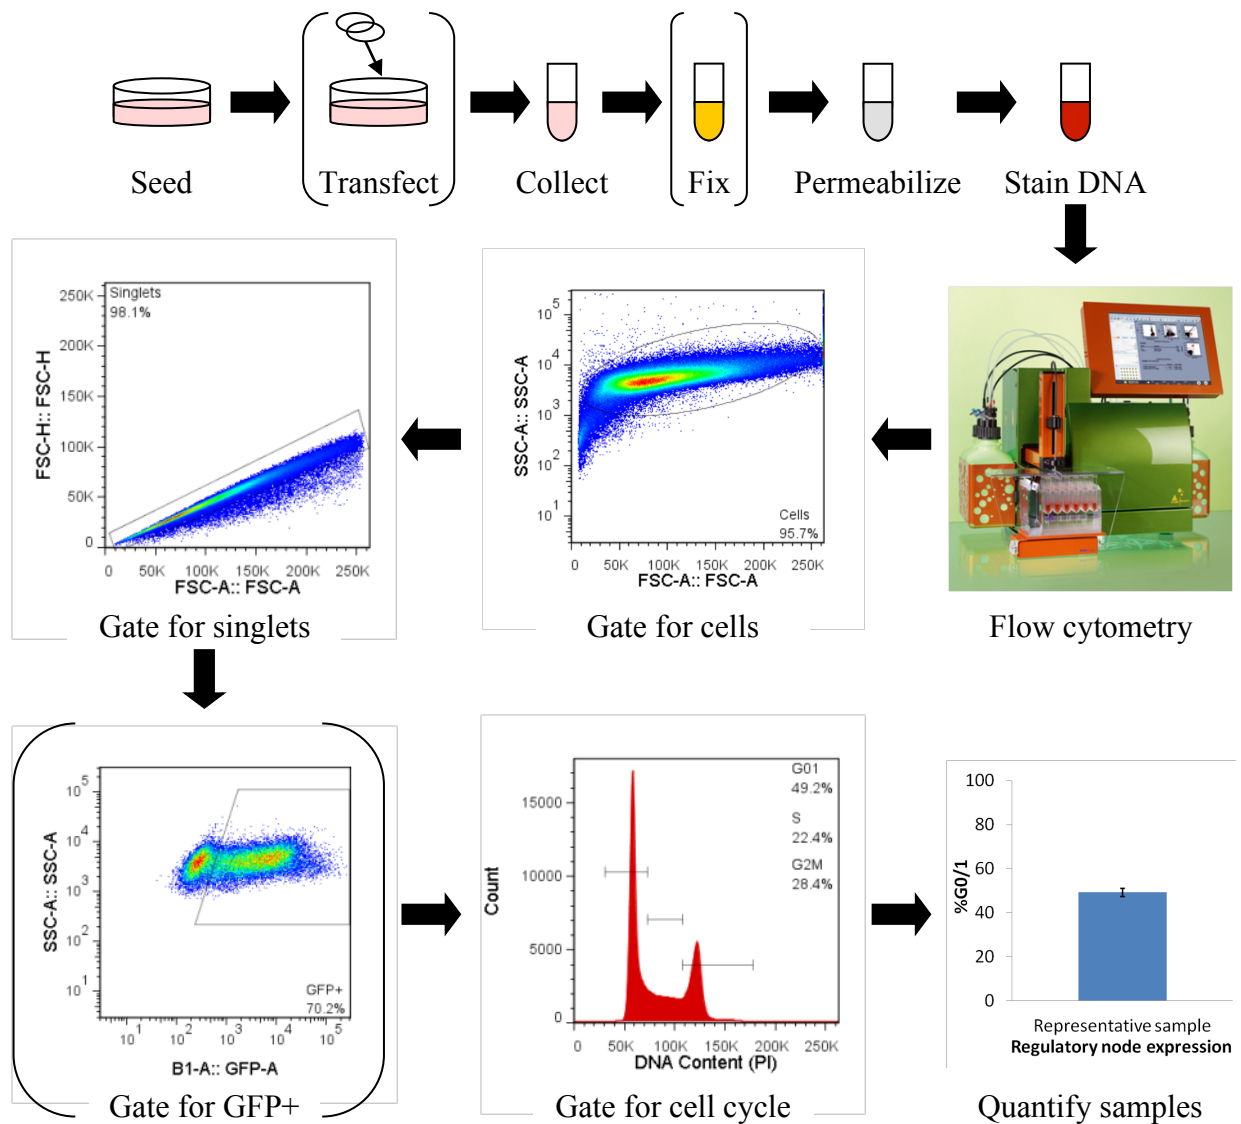

**Figure S1:** Overview of DNA staining and cell cycle quantification experiments. Generally, cells are seeded in dishes and grown for 3 days. Cells are then collected, permeabilized, and stained for DNA content and run on a flow cytometer. Each sample is analyzed by gating for cells using side scatter (SSC) vs. forward scatter (FSC) and for singlets using height of the forward scatter signal vs. the area of the forward scatter signal. The proportion of cells in G0/1 and G2/M can be quantified by gating on the amount of propidium iodide staining. The protocol with transient transfections has extra steps, shown in brackets including transfection, a fixation step, and gating on transfected cells using GFP.

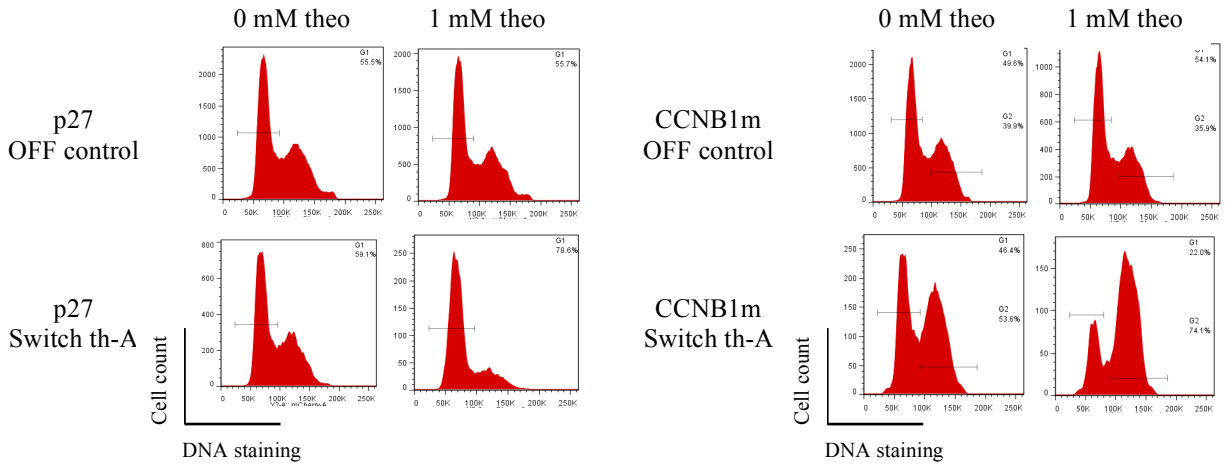

**Figure S2:** Representative histograms of cell count vs. DNA staining. Top row shows the OFF control, which does not change in the percentage of cells in any of the cell cycle phases between the addition 0 and 1 mM theophylline (theo). Bottom row shows the Switch th-A. For integrated p27-switch controllers (left), there is an increase in the percentage of cells in G0/1 (and correspondingly a decrease in G2/M) when 1 mM theo is added compared to when 0 mM theo is added. For integrated CCNB1m-switch controllers (right), there is an increase the percentage of cells in G2/M (and correspondingly decreases the percentage of cells in G0/1) when 1 mM theo is added compared to when 0 mM theo is added.

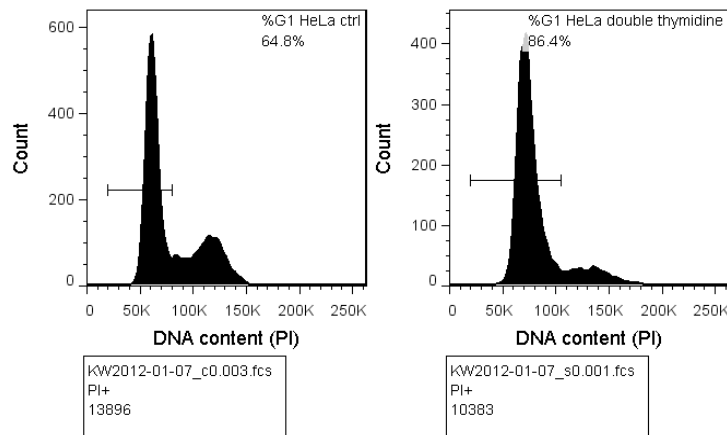

**Figure S3:** Double thymidine block treated (right graph) or control treated (left graph) HeLa cells. The percentage of cells in a population arrested in G0/1 was measured by DNA staining and flow cytometry.

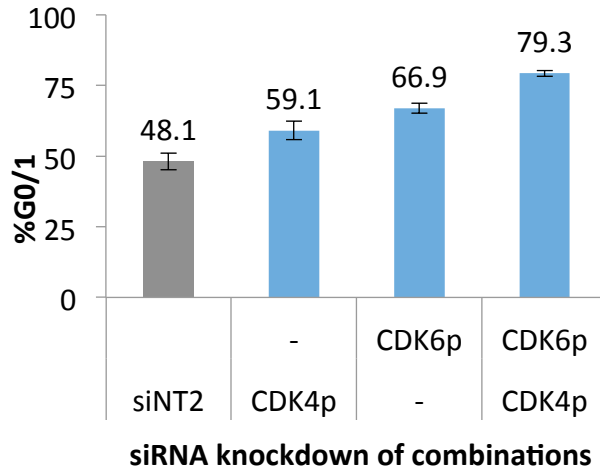

**Figure S4:** siRNA knockdown of CDK4, CDK6, or both CDK4 and CDK6 in U2-OS cells. siNT2 is a control sequence. The percentage of cells in a population arrested in G0/1 was measured by DNA staining and flow cytometry. Error bars represent standard deviation of triplicates.

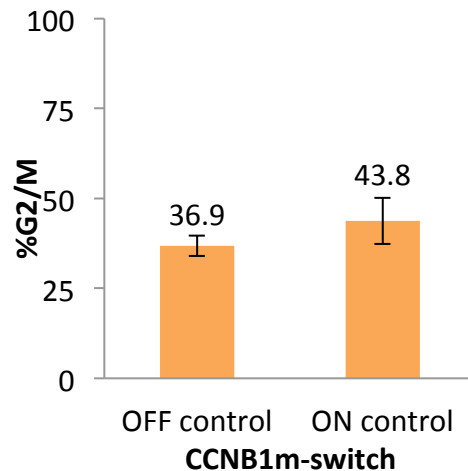

**Figure S5:** Ribozyme switch controls for arresting cells in G2/M. An OFF control (non-switch, wild-type sTRSV hammerhead ribozyme) and an ON control (non-switch, non-cleaving sTRSV hammerhead ribozyme) were inserted in the 3' UTR of CCNB1m, stably integrated into U2-OS T-Rex Flp-In cells, and tested for their ability to arrest cells in G2/M.

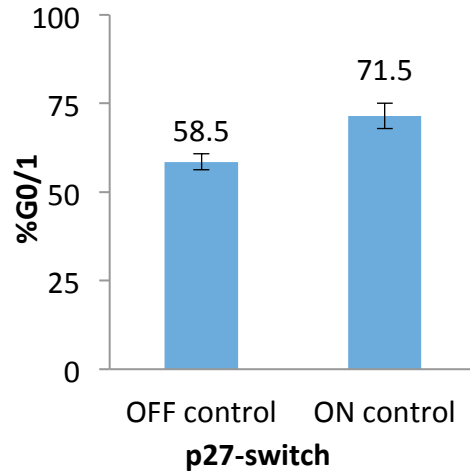

**Figure S6:** Ribozyme switch controls for arresting cells in G0/1. An OFF control (non-switch, wild-type sTRSV hammerhead ribozyme) and an ON control (non-switch, non-cleaving sTRSV hammerhead ribozyme) were inserted in the 3' UTR of p27, stably integrated into U2-OS T-Rex Flp-In cells, and tested for their ability to arrest cells in G0/1.

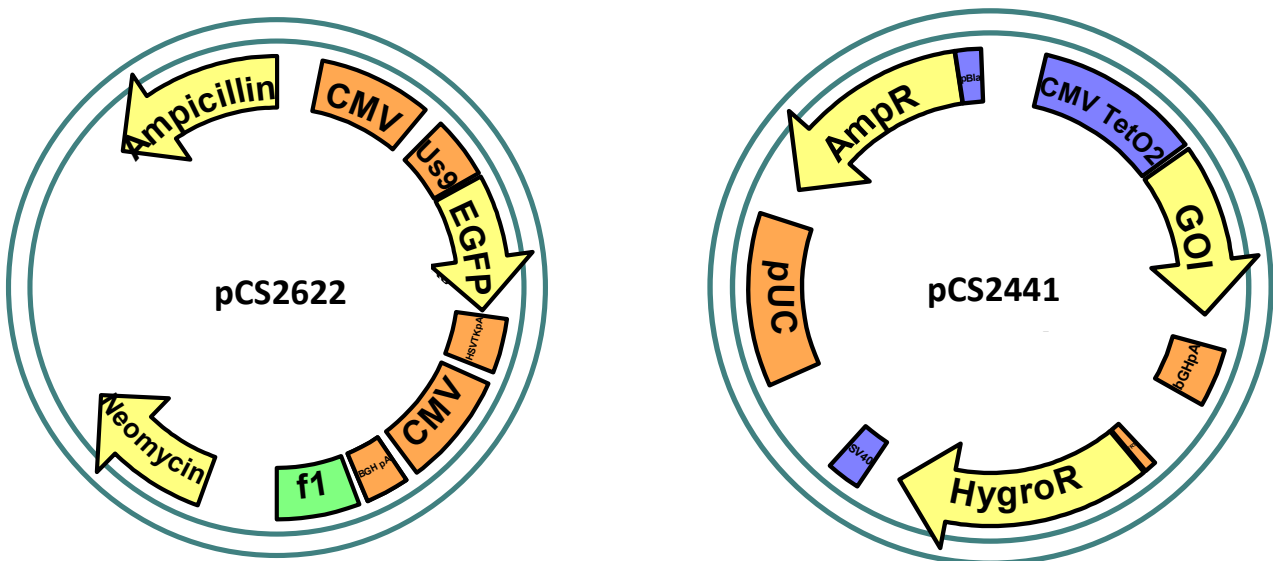

**Figure S7:** Plasmid maps of the two main plasmid backbones, pCS2622 and pCS2441. For pCS2441, the default gene of interest (GOI), DsRed, is subsequently replaced by sequences encoding regulatory nodes and ribozyme switches (or appropriate control).





**Table S1:** Regulatory nodes tested in this study. The nodes and a simplified descriptions of their functions in the mammalian cell cycle are listed in alphabetical order. When no reference is provided, see [4] for more information.

| Regulatory Node | Function                                                                                                                                                                                                                                                                                                                                                                                                                                                                                                                                                                                  |
|-----------------|-------------------------------------------------------------------------------------------------------------------------------------------------------------------------------------------------------------------------------------------------------------------------------------------------------------------------------------------------------------------------------------------------------------------------------------------------------------------------------------------------------------------------------------------------------------------------------------------|
| BubR1           | BubR1 is a spindle checkpoint protein involved in the detection of unattached kinetochores. Binding to Cdc20 suppresses anaphase-promoting complex (APC) function and inhibits metaphase-to-anaphase transition.                                                                                                                                                                                                                                                                                                                                                                          |
| Cdh1            | An activator of the APC such that the active APC-Cdh1 complex recognizes and destroys S and M cyclins and maintain cells in G1. Overexpression shown to arrest mammalian cells in G1[5].                                                                                                                                                                                                                                                                                                                                                                                                  |
| Chk2, Chk1      | Chk2,1 receive signaling of DNA damage response kinases ATR and ATM. Chk1 and Chk2 initiate many pathways for DNA repair, cell death or cell cycle arrest. Logically, DNA damage during S or G2 prevents entry into mitosis. Together they phosphorylate and inhibit the activity of the Cdc25 family (A, B, C). Specifically phosphorylate Cdc25C at Ser 216/287, which inhibits Cdc25C phosphatase activity, leading to an increase in inhibitory phosphorylation and therefore deactivation of M-Cdks (Cdk1). Also promotes activity of p53, which increases cell cycle arrest.        |
| Cyclin A        | Cyclin A is considered an S-phase cyclin, but has a role in mitosis. Specifically, it is a rate-limiting step for entry into mitosis [6]. Although direct role in arresting G2/M is unclear, because there was potential for inducing arrest in G2/M, cyclin A was tested. Cyclin A1 is expressed in germ cells and early embryo (partner Cdk1). Cyclin A2 (partner Cdk2) has no obvious difference in cell cycle function compared to cyclin A2 and therefore the subtypes are not generally distinguished.                                                                              |
| Cyclin B        | Cyclin B levels rises at the beginning of mitosis, cyclin B-Cdk activity activates the APC, and is destroyed by APC in late mitosis. Both cyclin B1 and B2 bind Cdk1. Drives centrosome separation, nuclear envelope breakdown and spindle assembly. Cyclin B1 seems to be more important (deletion causes embryonic lethality in mice while deletion of cyclin B2 does not). Complex into the nucleus in late prophase, promotes nuclear envelope breakdown, then redistributes into cytoplasm again after envelope breakdown. Cyclin B1mut (CCNB1(L45A, R42A) is non-degradable [7, 8]. |
| Cyclin D1       | Cyclin D-CDk activates E2F-dependent gene expression and progression from G0/1 to S. Here, this serves as a control that should show decreased arrest in G0/1, as supported by the data.                                                                                                                                                                                                                                                                                                                                                                                                  |
| DP-1            | Transcription factor that forms a heterodimer with E2F. DP family proteins are one part of a heterodimer with an E2F family protein that forms an E2F complex. These complexes control gene expression of G1/S and S cyclins among other genes.                                                                                                                                                                                                                                                                                                                                           |
| Emi1            | Emi1 inhibits Cdc20. Activated APC(Cdc20) is needed for the meta-phase to anaphase transition. Thus overexpression of Emi1 should result in increased proportion of cells in S and G2/M [5].                                                                                                                                                                                                                                                                                                                                                                                              |

|                |                                                                                                                                                                                                                                                                                                                                                                                                                                                                                                                                                                                                                                           |
|----------------|-------------------------------------------------------------------------------------------------------------------------------------------------------------------------------------------------------------------------------------------------------------------------------------------------------------------------------------------------------------------------------------------------------------------------------------------------------------------------------------------------------------------------------------------------------------------------------------------------------------------------------------------|
| Gadd45         | GADD45 family of stress response proteins. Is needed in G2/M arrest induced by UV radiation or alkylating agents [9].                                                                                                                                                                                                                                                                                                                                                                                                                                                                                                                     |
| hRb            | pRB proteins inhibit E2F-dependent gene expression, which activates cyclins that trigger the transition from G1 to S. Therefore overexpression should result in arrest of cells in G0/1. Here, neither overexpression of Rb nor pRBΔCDKHA (not shown) resulted in significant arrest [10]. pRBsm contains 2 nucleotide mutations that results in to Thr > Ala mutations at Thr821 and Thr836 specifically. Phosphorylation at Thr-821 and Thr-826 promotes interaction between the C-terminal domain C and the Pocket domain, and thereby inhibits interactions with heterodimeric E2F/DP transcription factor complexes (genecards.org). |
| Mad2           | Mad2 is a spindle checkpoint component that detects unattached kinetochores. When the checkpoint fails, Mad2 binds Cdc20, inhibiting function                                                                                                                                                                                                                                                                                                                                                                                                                                                                                             |
| Myc            | Myc is a transcription factor that regulates genes involved in metabolism, growth, ribosome synthesis, and differentiation but also division regulatory molecules like cyclin D2 and Cdk4. While most of the gene targets are related to growth rather than directly to division, in certain cell types division is tightly linked to growth.                                                                                                                                                                                                                                                                                             |
| Myt1           | Two inhibitory phosphorylations in Cdk (Thr 14, Tyr 15) and especially the M-Cdks. Wee1 is a kinase that catalyzes the inhibitory phosphorylation at Thr 14 and Myt1 is a kinase that catalyzes the phosphorylation of both Thr 14 and Tyr 15. In theory, if overexpression led to increased activity of either of these enzymes, then M-Cdks would be inhibited and cells would be more often arrested in G2/M.                                                                                                                                                                                                                          |
| p16(INK4a)     | Inhibitor of Cdk4 and Cdk6. INK4 family only bind Cdk4 and 6, preferring Cdk monomers and increased levels helps disassemble cyclin D-Cdk4,6 complexes. U2-OS, which is deficient in p16 should be especially sensitive to overexpression and this has been shown previously [10]                                                                                                                                                                                                                                                                                                                                                         |
| p21(Cip1/Waf1) | Inhibits cyclin E-Cdk2 and cyclin A-Cdk2,1 (G1/S- and S-Cdks respectively) and activates cyclin D-Cdk4 (G1-Cdks). Cip/Kip family of proteins help assemble the cyclin D-Cdk4,6 complexes, but inhibit the G1/S-Cdks and S-Cdks.                                                                                                                                                                                                                                                                                                                                                                                                           |
| p27(Kip1)      | Inhibits cyclin E-Cdk2 and cyclin A-Cdk2,1 (G1/S- and S-Cdks respectively) and activates cyclin D-Cdk4 (G1-Cdks). Cip/Kip family of proteins help assemble the cyclin D-Cdk4,6 complexes, but inhibit the G1/S-Cdks and S-Cdks.                                                                                                                                                                                                                                                                                                                                                                                                           |
| PP2A           | PP2A (protein phosphatase type 2A). Enhance inhibitory phosphorylations on M-Cdk by activating Wee1 and inactivating Cdc25 [11].                                                                                                                                                                                                                                                                                                                                                                                                                                                                                                          |
| Wee1           | Wee1mut contains S53/123A and E116/117A, meant to reduce de-stabilizing phosphorylations. S53/123 are important for recognition by SKP1/Cul1/F-box protein (SCF) complex with beta-TrCP and phosphorylation leads to degradation [12]. Binding of beta-TrCP was eliminated with E116/117A [12]. These changes should lead to a more stable Wee1 protein, whose overexpression results in increased arrest of cell in G2/M.                                                                                                                                                                                                                |

**Table S2:** Ribozyme switch performance in yeast and HEK293. Switch activities are reported as measured by the ratio of GFP/mCherry in a cell population (yeast or HEK293) harboring the indicated switch in the two-color characterization plasmid via flow cytometry.

| Switch Name in Legend | Alternative Switch Name  | Yeast Basal       | Yeast Induced     | HEK293 Basal | HEK293 Induced | Source |
|-----------------------|--------------------------|-------------------|-------------------|--------------|----------------|--------|
| OFF only              | sTRSV                    | 0.051<br>+/-0.003 | 0.051<br>+/-0.003 | 0.044        | 0.044          | [13]   |
| Switch th-A           | theoRs2 OR Theo(A)-AAAAA | 0.056<br>+/-0.002 | 0.509<br>+/-0.074 |              |                | [13]   |
| Switch th-B           | theoRs4 OR Theo(A)-CAGAA | 0.158<br>+/-0.006 | 1.258<br>+/-0.091 |              |                | [13]   |
| Switch th-C           | L2b9(1x)                 | 0.300             | 0.720             | 0.637        | 0.926          | [1]    |
| Switch th-Cx2         | L2b9(2x)                 | n/a               | n/a               | 0.314        | 0.801          | [1]    |

**Table S3:** Cell lines created in this study. Cell lines are created by stable integration into U2-OS T-Rex FlpIn lines using the FlpIn system. Blasticidin selection maintains T-Rex integration. Hygromycin selection maintains integrated cassette.

| Name in Legend       | Plasmid # | Cell Line Description          |
|----------------------|-----------|--------------------------------|
| p27 OFF only         | pCS3250   | pCS2441-syn21p27-sTRSV         |
| p27 Switch th-A      | pCS3252   | pCS2441-syn21p27-theoRs2       |
| CCNB1m OFF only      | pCS3257   | pCS2441-syn21CCNB1mut-sTRSV    |
| CCNB1m Switch th-C   | pCS3259   | pCS2441-syn21CCNB1mut-L2b9(1x) |
| CCNB1m Switch th-Cx2 | pCS3260   | pCS2441-syn21CCNB1mut-L2b9(2x) |
| CCNB1m Switch th-A   | pCS3261   | pCS2441-syn21CCNB1mut-theoRs2  |
| CCNB1m Switch th-B   | pCS3262   | pCS2441-syn21CCNB1mut-theoRs4  |

**Table S4:** Primer sequences used in this study.

| Name                   | Sequence                                                               |
|------------------------|------------------------------------------------------------------------|
| 25 ACTB FWD            | AGATCAAGATCATTGCTCCTCCT                                                |
| 26 ACTB REV            | TCATAGTCCGCTAGAAAGCAT                                                  |
| ApaI_XbaI_XhoI_CMV_rev | AATAGGGCCCCGAGAACTTGTCTAGACGAGAACTTGCTC<br>GAGTGAGCTCTGCTTATATAGACCTCC |
| ApaI_XhoI_CCNB1_rv     | ATATGGGCCCTCTAGCCCGGTCTCGAGTTACACCTTGC<br>CACAGCCTT                    |
| B1m-4_fw               | AACAGCTGCTGGGGACATT                                                    |
| B1m-4_rv               | ATAGGCTCAGGCGAAAGTTTT                                                  |
| BamHI_XbaI_CCNB1_fw    | ATTAGGATCCTCTAGAACTTAAAAAAAAAAATCAAAA<br>TGGCGCTCCGAGTCAC              |
| BsrGI_EcoRI_bGHpA_fwd  | AATATGTACAAGTAACGAATTCTGTGCCTTCTAGTTGC<br>CAG                          |
| EGFP EcoRI rev         | AATAGAATTCTTACTTGTACAGCTCGTCCA                                         |

|                    |                                                                                        |
|--------------------|----------------------------------------------------------------------------------------|
| GB_2441_syn21_fw   | AGATCGTCGACGGGGTACCGAGCTCGGATCCAACCTAA<br>AAAAAAAAATCAAATGTCAAACGTGCGAGTGTCTAAC<br>G   |
| GB_2441_Wee1mut_fw | GATAGAGATCGTCGACGGGGTACCGAGCTCAACTTAAA<br>AAAAAAAAATCAAATGAGTTTCCTGTCAAGACAGC          |
| GB_2441_Wee1mut_rw | CACAGTCGAGGCTGATCAGCGGGTTTAAACGGGCCCTCT<br>AGCCCGGTCTCGAGCTAGTAGATAGTCAGTGACACGGA<br>C |
| GB_2622_p27_fw     | ATATAAGCAGAGCTCACTCTAGAGCCGCGTAGGGGCGC<br>TTT                                          |
| GB_2622_p27_rev    | GGGTTTAAACGGGCCCTCTAGCCCGGTCTCGAGTTACGT<br>TTGACGTCTTCTGAGGCCAG                        |
| GB_2622_RB1_p1_fw  | TAAGCAGAGCTCACTCGACTATCGATACCACCATGCCGC<br>CCAAAACCCCC                                 |
| GB_2622_RB1_p2_rev | AACGGGCCCTACGTCTTGACTCGAGTCATTTCTTCTCCT<br>GTTTGAGGTATC                                |
| GB_Cas9_P2A_fw     | CGAAAAGGCCGGCCAGGCAAAAAGAAAAGAAAA<br>GGCTACTAACTTCAGCCTGCTG                            |
| GB_IRES_p27_rev    | ACCGAACAAAACAAGCGCCCTACGCGGCGATATCGG<br>CCATATTATCATCGTGTTTTTCAAAGGAAAACC              |
| GB_postRZ_rev      | TAAGCTTGATCCCTCGATGTAACTCTAGAGTTTAAACG<br>GGCCCTCTAGACTCGA                             |
| GB_RB1_p2p1_fw     | AGGTCTGCCAGCACCAACAAAATGGCTCCAAGATCAA<br>GAATCTTAGTATCAATTGGTG                         |
| GB_RB1_p2p1_rev    | TTTGTTGGTGCTGGCAGACCTTCTGAAATTTTATATGGAC<br>TC                                         |
| HSVTK_EcoRI_fwd    | AATAGAATTCATGAGACGATCTCATGCTGGA                                                        |
| HSVTK_EcoRV_rev    | AATAGATATCTACTGAGAGTGCACCATAGGG                                                        |
| MCS_fwd            | phosph-<br>AATTGTCGCGAGCTAGCCTTAAGAAGCTTCCTAGGC                                        |
| MCS_rev            | phosph-<br>CCGGCCCTAGGAAGCTTCTTAAGGCTAGCTCGCGAC                                        |
| p16_ApaI_rev       | ATAAGGGCCCTACGTCTTGACTCGAGTCAATCGGGGATA<br>TCT                                         |
| p16_Sall_XbaI_fw   | AATAGTCGACTCTAGAACCACCATGGAGCCTTC                                                      |
| RzApaIPacI_rev     | AGAAGGGCCCAAGATTAATTAATAAAAAAAAAAATTTTATTT<br>TTCTTTTTGCTGTT                           |
| RzApaIPacI_rev     | AGAAGGGCCCAAGATTAATTAATAAAAAAAAAAATTTTATTT<br>TTCTTTTTGCTGTT                           |
| RzXhoIAsiSI_fw     | AATACTCGAGGCGATCGCAAACAAACAAAGCTGTCACC<br>G                                            |
| RzXhoIAsiSI_fw     | AATACTCGAGGCGATCGCAAACAAACAAAGCTGTCACC<br>G                                            |
| Us9_KpnI_fwd       | AATAGGTACCATGCCCGCCGC                                                                  |

**Table S5:** List of the plasmids used in this study. Plasmids obtained from Addgene are indicated by the Addgene plasmid number.

| Plasmid # | Addgene # | Description                    | Reference               |
|-----------|-----------|--------------------------------|-------------------------|
| pCS2052   | 18657     | pBB14                          | [2]                     |
| pCS2622   |           | CMV-Usg9-EGFP                  | this work               |
| pCS2441   |           | CMVTetO2-DsRed-bGHpA (FlpIn)   | this work               |
| pCS2587   |           | CMV-mCherry                    | gift from Melina Mathur |
| pCS2623   | 10720     | pSG5L HA RB                    | [14]                    |
| pCS2624   | 10916     | pCMV p16 INK4A                 | [15]                    |
| pCS2625   | 11596     | HA-cdh1                        | [16]                    |
| pCS2626   | 37968     | pCMV-Neo-Bam DP1               | [17]                    |
| pCS2770   |           | ECE-pRBΔCDK-HA                 | [10]                    |
| pCS2772   | 11182     | pCDNA-cyclinD1HAT286A          | [18]                    |
| pCS2773   | 16240     | Flag p21 WT                    | [19]                    |
| pCS2774   | 14049     | pCMV5 human p27                | [20]                    |
| pCS3245   |           | pCS2622-pRBsm                  | this work               |
| pCS3341   |           | pCS2622-p16                    | this work               |
| pCS3342   |           | pCS2622-p27                    | this work               |
|           | 47330     | BubR1                          | [21]                    |
|           | 16047     | Mad2                           | [22]                    |
|           | 41901     | Chk2                           | [23]                    |
|           | 39854     | Emi1                           | [24]                    |
|           | 22894     | Chk1                           | [25]                    |
|           | 24929     | GADD45                         | [26]                    |
|           | 22695     | pMyt1a                         | [27]                    |
|           | 10911     | CyclinB2                       | [28]                    |
|           | 26060     | CyclinB1                       | [29]                    |
|           | 8959      | CyclinA                        | [28]                    |
| pCS3246   |           | pCS2441-Wee1mut                | this work               |
|           | 39856     | Myc                            | [30]                    |
|           | 15248     | PP2A                           | [31]                    |
|           | 39852     | CyclinB1mut                    | [7]                     |
| pCS3249   |           | pCS2441-syn21p27               | this work               |
| pCS3247   |           | pCS2786-Cas9-mCherry-theoRs2   | this work               |
| pCS3250   |           | pCS2441-syn21p27-sTRSV         | this work               |
| pCS3252   |           | pCS2441-syn21p27-theoRs2       | this work               |
| pCS3256   |           | pCS2441-syn21CCNB1mut          | this work               |
| pCS3257   |           | pCS2441-syn21CCNB1mut-sTRSV    | this work               |
| pCS3259   |           | pCS2441-syn21CCNB1mut-L2b9(1x) | this work               |
| pCS3260   |           | pCS2441-syn21CCNB1mut-L2b9(2x) | this work               |

|         |  |                               |           |
|---------|--|-------------------------------|-----------|
| pCS3261 |  | pCS2441-syn21CCNB1mut-theoRs2 | this work |
| pCS3262 |  | pCS2441-syn21CCNB1mut-theoRs4 | this work |

**Table S6:** Sequences of ribozyme controls and switches used in this study. Sequences listed below include the restriction sites for XhoI (ctcgag) and AsiSI (gcgatgc) 5' of the switch sequence and PacI (ttaattaa) and ApaI (gggcccc) 3' of the sequence. Main switch sequence is underlined and flanked by short spacer sequences which are italicized.

| Switch Name in Legend | Alternative Switch Name  | Sequence                                                                                                                                                                                                                                                                                                                                                                                                                                               | Source |
|-----------------------|--------------------------|--------------------------------------------------------------------------------------------------------------------------------------------------------------------------------------------------------------------------------------------------------------------------------------------------------------------------------------------------------------------------------------------------------------------------------------------------------|--------|
| OFF only              | sTRSV                    | ctc <span style="text-decoration: underline">gag</span> gcgatgc <i>AAACAACAAAG</i> <u>GCTGTCACCGGATGT</u><br>GCTTCCGGTCTGATGAGTCCGTGAGGACGAAA<br><u>CAGCAAAAAGAAAAATAAAAATTTTTT</u> GGAAGggcccc                                                                                                                                                                                                                                                        | [13]   |
| Switch th-A           | theoRs2 OR Theo(A)-AAAA  | ctc <span style="text-decoration: underline">gag</span> gcgatgc <i>AAACAACAAAG</i> <u>GCTGTCACCGGAAT</u><br>ACCAGCATCGTCTTGATGCCCTTGGAAGTCCGGT<br>CTGATGAGTCCAAAAAGGACGAAACAGC <i>AAAAA</i><br><i>GAAAAATAAAAATTTTTTTT</i> ttaattaaTCTTgggcccc                                                                                                                                                                                                         | [13]   |
| Switch th-B           | theoRs4 OR Theo(A)-CAGAA | ctc <span style="text-decoration: underline">gag</span> gcgatgc <i>AAACAACAAAG</i> <u>GCTGTCACCGGAAT</u><br>ACCAGCATCGTCTTGATGCCCTTGGAAGTCCGGT<br>CTGATGAGTCCCAGAAGGACGAAACAGC <i>AAAAA</i><br><i>GAAAAATAAAAATTTTTTTT</i> ttaattaaTCTTgggcccc                                                                                                                                                                                                         | [13]   |
| Switch th-C           | L2b9(1x)                 | ctc <span style="text-decoration: underline">gag</span> gcgatgc <i>AAACAACAAAG</i> <u>GCTGTCACCGGATGT</u><br>GCTTCCGGTCTGATGAGTCCGTTGTCCAATACC<br>AGCATCGTCTTGATGCCCTTGGCAGTGGATGGGG<br><u>ACGGAGGACGAAACAGCAAAAAGAAAAATAAAAAT</u><br><i>TTTTTTT</i> ttaattaaTCTTgggcccc                                                                                                                                                                               | [1]    |
| Switch th-Cx2         | L2b9(2x)                 | ctc <span style="text-decoration: underline">gag</span> gcgatgc <i>AAACAACAAAG</i> <u>GCTGTCACCGGATGT</u><br>GCTTCCGGTCTGATGAGTCCGTTGTCCAATACC<br>AGCATCGTCTTGATGCCCTTGGCAGTGGATGGGG<br><u>ACGGAGGACGAAACAGCAAAAAGAAAAATAAAAAT</u><br><i>TTTTTTTTAATCGCAACAACAAAG</i> GCTGTCACCG<br>GATGTGCTTCCGGTCTGATGAGTCCGTTGTCCA<br>ATACCAGCATCGTCTTGATGCCCTTGGCAGTGGAA<br>TGGGGACGGAGGACGAAACAGC <i>AAAAAGAAAAAT</i><br><i>AAAAATTTTTTTT</i> ttaattaaTCTTgggcccc | [1]    |

## REFERENCES

1. Wei KY, Chen YY, Smolke CD. A yeast-based rapid prototype platform for gene control elements in mammalian cells. *Biotechnology and bioengineering*. 2013;110(4):1201-10. doi:10.1002/bit.24792.
2. Brideau AD, Banfield BW, Enquist LW. The Us9 gene product of pseudorabies virus, an alphaherpesvirus, is a phosphorylated, tail-anchored type II membrane protein. *Journal of virology*. 1998;72(6):4560-70.
3. Bloom RJ, Winkler SM, Smolke CD. A quantitative framework for the forward design of synthetic miRNA circuits. *Nature methods*. 2014;11(11):1147-53. doi:10.1038/nmeth.3100.
4. Morgan DO. *The cell cycle : principles of control*. *Primers in biology*. London Sunderland, MA: Published by New Science Press in association with Oxford University Press ; Distributed inside North America by Sinauer Associates, Publishers; 2007.
5. Hsu JY, Reimann JD, Sorensen CS, Lukas J, Jackson PK. E2F-dependent accumulation of hEml1 regulates S phase entry by inhibiting APC(Cdh1). *Nat Cell Biol*. 2002;4(5):358-66. doi:10.1038/ncb785  
ncb785 [pii].
6. Pagano M, Pepperkok R, Verde F, Ansorge W, Draetta G. Cyclin A is required at two points in the human cell cycle. *EMBO J*. 1992;11(3):961-71.
7. Gavet O, Pines J. Activation of cyclin B1-Cdk1 synchronizes events in the nucleus and the cytoplasm at mitosis. *The Journal of cell biology*. 2010;189(2):247-59. doi:10.1083/jcb.200909144.
8. Gavet O, Pines J. Progressive activation of CyclinB1-Cdk1 coordinates entry to mitosis. *Dev Cell*. 2010;18(4):533-43. doi:S1534-5807(10)00111-5 [pii]



10.1016/j.devcel.2010.02.013.

9. Wang XW, Zhan Q, Coursen JD, Khan MA, Kontny HU, Yu L et al. GADD45 induction of a G2/M cell cycle checkpoint. *Proc Natl Acad Sci U S A*. 1999;96(7):3706-11.

10. Lukas J, Herzinger T, Hansen K, Moroni MC, Resnitzky D, Helin K et al. Cyclin E-induced S phase without activation of the pRb/E2F pathway. *Genes Dev*. 1997;11(11):1479-92.

11. Janssens V, Goris J. Protein phosphatase 2A: a highly regulated family of serine/threonine phosphatases implicated in cell growth and signalling. *Biochem J*. 2001;353(Pt 3):417-39.

12. Watanabe N, Arai H, Nishihara Y, Taniguchi M, Hunter T, Osada H. M-phase kinases induce phospho-dependent ubiquitination of somatic Wee1 by SCFbeta-TrCP. *Proc Natl Acad Sci U S A*. 2004;101(13):4419-24. doi:10.1073/pnas.0307700101  
0307700101 [pii].

13. Townshend B, Kennedy AB, Xiang JS, Smolke CD. High-Throughput, Data-Rich Cellular RNA Device Engineering. *Nature methods*. 2015.

14. Sellers WR, Novitch BG, Miyake S, Heith A, Otterson GA, Kaye FJ et al. Stable binding to E2F is not required for the retinoblastoma protein to activate transcription, promote differentiation, and suppress tumor cell growth. *Genes Dev*. 1998;12(1):95-106.

15. Medema RH, Herrera RE, Lam F, Weinberg RA. Growth suppression by p16ink4 requires functional retinoblastoma protein. *Proc Natl Acad Sci U S A*. 1995;92(14):6289-93.

16. Pflieger CM, Lee E, Kirschner MW. Substrate recognition by the Cdc20 and Cdh1 components of the anaphase-promoting complex. *Genes Dev*. 2001;15(18):2396-407.  
doi:10.1101/gad.918201.

17. Moberg K, Starz MA, Lees JA. E2F-4 switches from p130 to p107 and pRB in response to cell cycle reentry. *Molecular and cellular biology*. 1996;16(4):1436-49.

18. Newman RM, Mobascher A, Mangold U, Koike C, Diah S, Schmidt M et al. Antizyme targets cyclin D1 for degradation. A novel mechanism for cell growth repression. *The Journal of biological chemistry*. 2004;279(40):41504-11. doi:10.1074/jbc.M407349200.
19. Zhou BP, Liao Y, Xia W, Spohn B, Lee MH, Hung MC. Cytoplasmic localization of p21Cip1/WAF1 by Akt-induced phosphorylation in HER-2/neu-overexpressing cells. *Nat Cell Biol*. 2001;3(3):245-52. doi:10.1038/35060032.
20. Luo Y, Hurwitz J, Massague J. Cell-cycle inhibition by independent CDK and PCNA binding domains in p21Cip1. *Nature*. 1995;375(6527):159-61. doi:10.1038/375159a0.
21. Holland AJ, Fachinetti D, Han JS, Cleveland DW. Inducible, reversible system for the rapid and complete degradation of proteins in mammalian cells. *Proc Natl Acad Sci U S A*. 2012;109(49):E3350-7. doi:10.1073/pnas.1216880109.
22. Wassmann K, Liberal V, Benezra R. Mad2 phosphorylation regulates its association with Mad1 and the APC/C. *EMBO J*. 2003;22(4):797-806. doi:10.1093/emboj/cdg071.
23. Matsuoka S, Ballif BA, Smogorzewska A, McDonald ER, 3rd, Hurov KE, Luo J et al. ATM and ATR substrate analysis reveals extensive protein networks responsive to DNA damage. *Science*. 2007;316(5828):1160-6. doi:10.1126/science.1140321.
24. Di Fiore B, Pines J. Emi1 is needed to couple DNA replication with mitosis but does not regulate activation of the mitotic APC/C. *The Journal of cell biology*. 2007;177(3):425-37. doi:10.1083/jcb.200611166.
25. Unsal-Kacmaz K, Chastain PD, Qu PP, Mino P, Cordeiro-Stone M, Sancar A et al. The human Tim/Tipin complex coordinates an Intra-S checkpoint response to UV that slows replication fork displacement. *Molecular and cellular biology*. 2007;27(8):3131-42. doi:10.1128/MCB.02190-06.

26. Yang Q, Manicone A, Coursen JD, Linke SP, Nagashima M, Forgues M et al. Identification of a functional domain in a GADD45-mediated G2/M checkpoint. *The Journal of biological chemistry*. 2000;275(47):36892-8. doi:10.1074/jbc.M005319200.
27. Kim JG, Hudson LD. Novel member of the zinc finger superfamily: A C2-HC finger that recognizes a glia-specific gene. *Molecular and cellular biology*. 1992;12(12):5632-9.
28. Hinds PW, Mitnacht S, Dulic V, Arnold A, Reed SI, Weinberg RA. Regulation of retinoblastoma protein functions by ectopic expression of human cyclins. *Cell*. 1992;70(6):993-1006.
29. Hagting A, Jackman M, Simpson K, Pines J. Translocation of cyclin B1 to the nucleus at prophase requires a phosphorylation-dependent nuclear import signal. *Current biology : CB*. 1999;9(13):680-9.
30. den Elzen N, Pines J. Cyclin A is destroyed in prometaphase and can delay chromosome alignment and anaphase. *The Journal of cell biology*. 2001;153(1):121-36.
31. Sablina AA, Chen W, Arroyo JD, Corral L, Hector M, Bulmer SE et al. The tumor suppressor PP2A A $\beta$  regulates the RalA GTPase. *Cell*. 2007;129(5):969-82. doi:10.1016/j.cell.2007.03.047.
